# Supplementary material for: Continuous Production of Ethanol, 1-Butanol and 1-Hexanol from CO with a Synthetic Co-Culture of Clostridia Applying a Cascade of Stirred-Tank Bioreactors
Source: MDPI journal article supplement (doi:10.3390/microorganisms11041003), 2023-04-12
Supplement: s1 [file s1]

### Supplementary material.

**Table S1** Composition of the previously described medium [20] used for preculture and batch studies

| Component                       | Formula                                                              | Concentration in Stock solution, g L <sup>-1</sup> |
|---------------------------------|----------------------------------------------------------------------|----------------------------------------------------|
| <b>Mineral solution</b>         |                                                                      | <b>33.3x</b>                                       |
| Ammonium chloride               | NH <sub>4</sub> Cl                                                   | 100                                                |
| Sodium chloride                 | NaCl                                                                 | 80                                                 |
| potassium chloride              | KCl                                                                  | 10                                                 |
| potassium dihydrogen phosphate  | KH <sub>2</sub> PO <sub>4</sub>                                      | 10                                                 |
| Magnesium sulfate               | MgSO <sub>4</sub>                                                    | 20                                                 |
| Calcium chloride                | CaCl <sub>2</sub>                                                    | 4                                                  |
| <b>Vitamin solution</b>         |                                                                      | <b>100x</b>                                        |
| Pyridoxine                      | C <sub>8</sub> H <sub>11</sub> NO <sub>3</sub>                       | 0.01                                               |
| Thiamine                        | C <sub>12</sub> H <sub>17</sub> ClN <sub>4</sub> OS                  | 0.005                                              |
| Riboflavin                      | C <sub>17</sub> H <sub>20</sub> N <sub>4</sub> O <sub>6</sub>        | 0.005                                              |
| Calcium pantothenate            | Ca(C <sub>9</sub> H <sub>16</sub> NO <sub>5</sub> ) <sub>2</sub>     | 0.005                                              |
| Liponic acid                    | C <sub>8</sub> H <sub>14</sub> O <sub>2</sub> S <sub>2</sub>         | 0.005                                              |
| Para amino benzoic acid         | C <sub>7</sub> H <sub>7</sub> NO <sub>2</sub>                        | 0.005                                              |
| Nicotinic acid                  | C <sub>6</sub> H <sub>5</sub> NO <sub>2</sub>                        | 0.005                                              |
| Vitamin B12                     | C <sub>72</sub> H <sub>100</sub> CoN <sub>18</sub> O <sub>17</sub> P | 0.005                                              |
| D-biotin                        | C <sub>10</sub> H <sub>16</sub> N <sub>2</sub> O <sub>3</sub> S      | 0.002                                              |
| Folic acid                      | C <sub>19</sub> H <sub>19</sub> N <sub>7</sub> O <sub>6</sub>        | 0.002                                              |
| 2-mercapto ethane sulfonic acid | C <sub>2</sub> H <sub>6</sub> O <sub>3</sub> S <sub>2</sub>          | 0.02                                               |
| <b>Trace element solution</b>   |                                                                      | <b>100x</b>                                        |

|                       |                                       |      |
|-----------------------|---------------------------------------|------|
| Nitrilotriacetic acid | $\text{C}_6\text{H}_9\text{NO}_6$     | 2.00 |
| Manganese sulfate     | $\text{MnSO}_4$                       | 1.00 |
| Ammonium iron sulfate | $\text{NH}_4\text{Fe}(\text{SO}_4)_2$ | 0.80 |
| Cobalt chloride       | $\text{CoCl}_2$                       | 0.20 |
| Zinc sulfate          | $\text{ZnSO}_4$                       | 0.20 |
| Copper chloride       | $\text{CuCl}_2$                       | 0.02 |
| Nickel chloride       | $\text{NiCl}_2$                       | 0.02 |
| Sodium molybdate      | $\text{Na}_2\text{MoO}_4$             | 0.02 |
| Sodium selenate       | $\text{Na}_2\text{SeO}_4$             | 0.02 |
| Sodium wolframate     | $\text{Na}_2\text{WO}_4$              | 0.02 |

**Medium concentration**

|                                                    |                                               |                        |
|----------------------------------------------------|-----------------------------------------------|------------------------|
| <b>Yeast extract</b>                               |                                               | 1.0 g L <sup>-1</sup>  |
| <b>Cysteine hydrochloride</b>                      | $\text{C}_3\text{H}_7\text{NO}_2\text{S HCl}$ | 0.5 g L <sup>-1</sup>  |
| <b>Morpholino ethanesulfonic acid<sup>a)</sup></b> | $\text{C}_6\text{H}_{13}\text{NO}_4\text{S}$  | 15.0 g L <sup>-1</sup> |
| <b>Polypropylene glycol (1:10)<sup>b)</sup></b>    |                                               | 0.1 mL L <sup>-1</sup> |

a) used only for heterotrophic preculture in anaerobic flasks

b) only for reactor studies

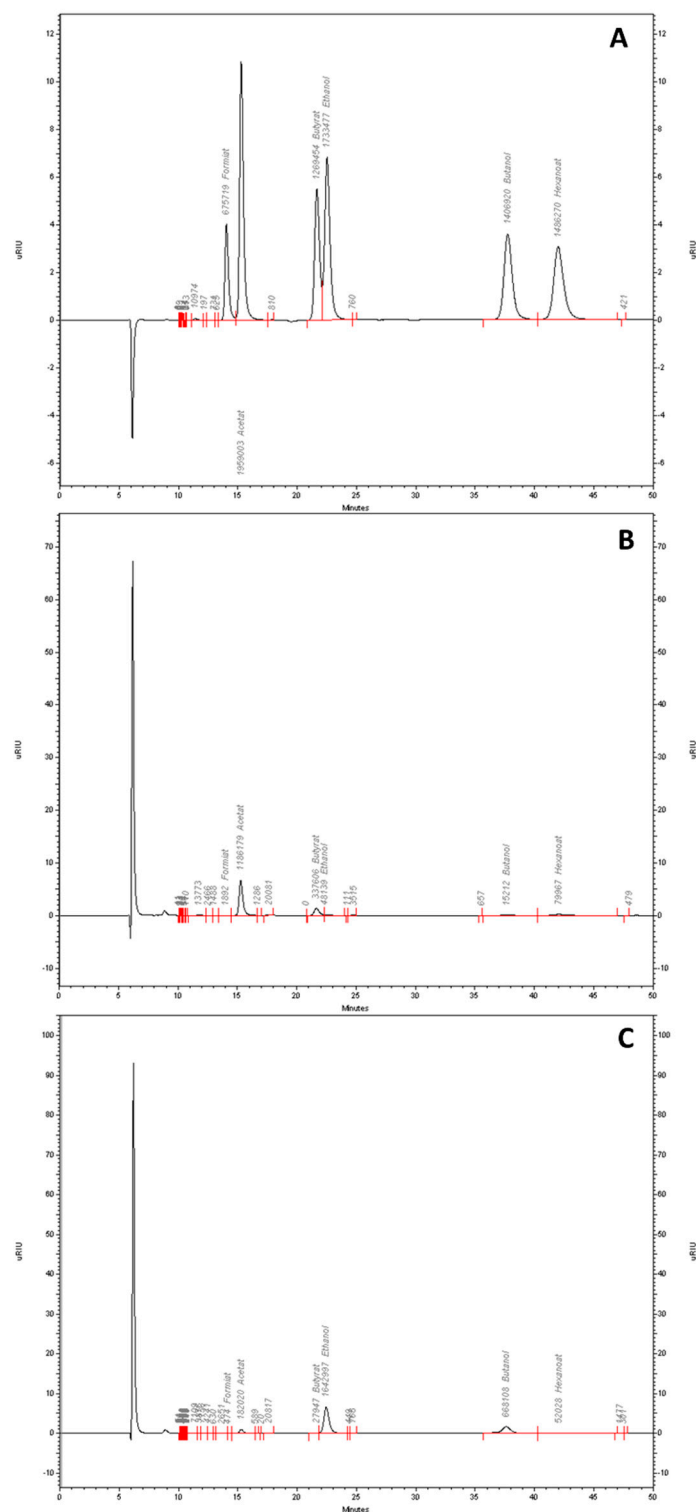

**Figure S1** Chromatograms of the organic acids and alcohols measured by HPLC (Finnigan Surveyor, Thermo Fisher Scientific, Waltham, USA) equipped with a refractive in-dex (RI) detector (Finnigan Surveyor RI Plus Detector, Thermo Fisher Scientific, Waltham, USA) and an Aminex-HPX-87H ion exchange column (Biorad, Munich, Germany). Separation of organic acids and alcohols was carried out at a constant flow rate of  $0.6 \text{ mL min}^{-1}$  of  $5 \text{ mM H}_2\text{SO}_4$  as eluent at a column temperature of  $60^\circ\text{C}$ . (A) all products; (B) sample of the first reactor after 167 h; (C) sample of the second reactor after 167 h of process time.

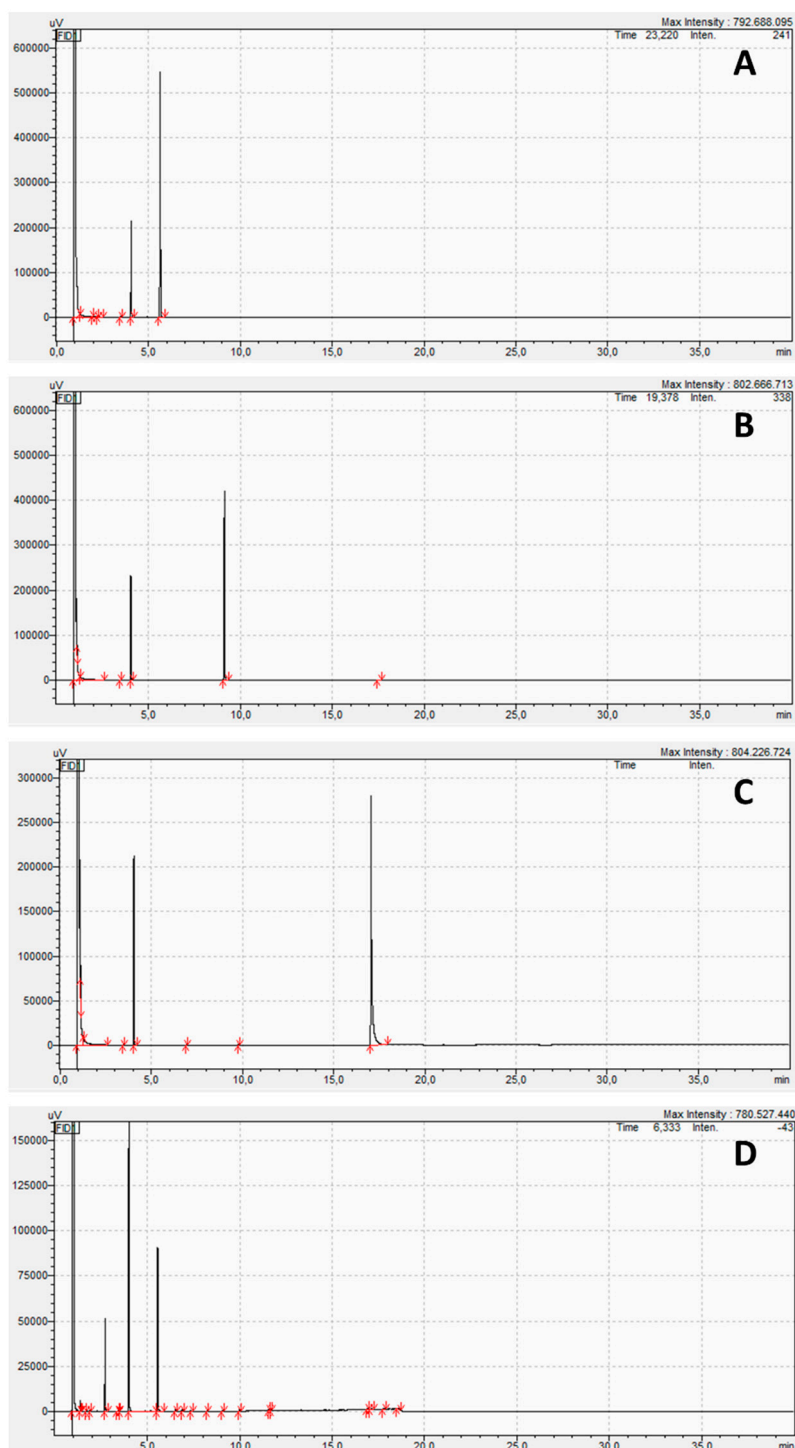

**Figure S2** Chromatograms of the gas chromatographic (GC) analysis, automated by using an autosampler (AOC-20s, Shimadzu Corp., Kyoto, Japan) and a GC auto-injector (AOC-20i, Shimadzu Corp., Kyoto, Japan), which took a sample volume of 5  $\mu\text{L}$  with a split of the injector of 50. The stationary phase: GC capillary column (FameWax, Restek), mobile phase (4.35  $\text{mL min}^{-1}$ ; 4.96 bar): helium. The column temperature was increased from 50  $^{\circ}\text{C}$  to 180  $^{\circ}\text{C}$  at 7  $^{\circ}\text{C min}^{-1}$  after each sample injection. After the products were separated on the GC capillary column, they were detected by a flame ionization detector (FID-2010 Plus, Shimadzu Corp., Kyoto, Japan) operated at a temperature of 250  $^{\circ}\text{C}$  with flow rates of 40  $\text{mL min}^{-1}$  ( $\text{H}_2$ ) and 400  $\text{mL min}^{-1}$  (He), respectively. (A) 1-Pentanol and 1-Hexanol; (B) 1-Pentanol and 1-Octanol; (C) 1-Pentanol and octanoate; (D) sample of the second reactor after 167 h with 1-Pentanol and 1-Hexanol. First peak is hexane.
